# Supplementary material for: Possible neuropathic pain in patients with osteoarthritis of the knee before and after total knee arthroplasty
Source: Research Square preprint supplement (doi:10.21203/rs.3.rs-190757/v2), 2021-04-26
Supplement: Supplementary file 1 [file 1eb211420fe94e0f166389bf.xlsx]

## Sheet: Sheet1
Table 3 Comparison between patients with the preoperative pain phenotypes of possible neuropathic pain
(neuropathic pain or unclear pain) versus those with nociceptive pain
		Possible neuropathic pain	Nociceptive pain	p-value
		N = 40	N = 140
NRS scores	Preoperative	5.3	5.4	0.940
	Postoperative	1.5	1.2	0.153
Gender	Male	7	28	0.824
	Female	33	112
Age (years)		74.5	73.5	0.398
BMI (kg/m2)		27.2	25.8	0.083
Flexion angle (degrees)		113	117	0.946
KL grade	3	22	56	0.105
	4	18	84
Data are shown as means or ratios (%).
NRS: numerical rating scale; BMI: body mass index; KL: Kellgren - Lawrence
