# Supplementary material for: Possible neuropathic pain in patients with osteoarthritis of the knee before and after total knee arthroplasty
Source: Research Square preprint supplement (doi:10.21203/rs.3.rs-190757/v2), 2021-04-26
Supplement: Supplementary file 3 [file c00d3d7d856950ea61e96e06.xlsx]

## Sheet: Sheet1
Table 1 PainDETECT questionnaire (PDQ) [6]
Item		Score
Gradation of pain*
	Do you suffer from a burning sensation (e.g. stinging nettles) in the marked areas?	0-5
	Do you have a tingling or prickling sensation in the area of your pain (like crawling ants or electrical tingling)?	0-5
	Is light touching (clothing, a blanket) in this area painful?	0-5
	Do you have sudden pain attacks in the area of your pain, like electric shocks?	0-5
	Is cold or heat (bath water) in this area occasionally painful?	0-5
	Do you suffer from a sensation of numbness in the areas that you marked?	0-5
	Does slight pressure in this area, e.g. with a finger, trigger pain?	0-5
Pain course pattern
	Persistent pain with slight fluctuations	0
	Persistent pain with pain attacks	-1
	Pain attacks without pain between them	1
	Pain attacks with pain between them	1
Radiating pain
	Does your pain radiate to other regions of your body?	Yes: +2
		No: 0
*For each question: never, 0; hardly noticed, 1; slightly, 2; moderately, 3; strongly, 4; very strongly, 5
