# Supplementary material for: Possible neuropathic pain in patients with osteoarthritis of the knee before and after total knee arthroplasty
Source: Research Square preprint supplement (doi:10.21203/rs.3.rs-190757/v2), 2021-04-26
Supplement: Supplementary file 4 [file c996657e27af47cf37877eb4.xlsx]

## Sheet: Sheet1
Table 4 Prevalence of neuropathic pain in knee osteoarthritis patients in the literature
assessed using the painDETECT questionnaire (PDQ)
	Neuropathic pain (%)	Possible neuropathic pain* (%)
Moreton et al. [4]	27
Hochman et al. [16]	28
Ohtori et al. [15]	5	21
Valdes et al. [17]	15	34
Roubille et al. [11]	32	50
Blikman et al. [18]		46
Present study	6	22
* Including both neuropathic pain and unclear pain
