# Supplementary material for: Possible neuropathic pain in patients with osteoarthritis of the knee before and after total knee arthroplasty
Source: Research Square preprint supplement (doi:10.21203/rs.3.rs-190757/v2), 2021-04-26
Supplement: Supplementary file 5 [file 8f288492074f3fa1d87fe549.xlsx]

## Sheet: T1
Table 2 Prevalence of the different pain phenotypes in patients with osteoarthritis of the knee
	Nociceptive pain	Unclear pain	Neuropathic pain	Possible neuropathic pain*
	N (%)	N (%)	N (%)	N (%)
Preoperative	140 (77.8)	30 (16.7)	10 (5.6)	40 (22.2)
Postoperative	174 (96.7)	5 (2.8)	1 (0.6)	6 (3.3)
* Including neuropathic pain and unclear pain
